# Supplementary material for: JNK regulates muscle remodeling via myostatin/SMAD inhibition
Source: PubMed Central journal article supplement (PMC6072737; doi:10.1038/s41467-018-05439-3), 2018-08-02
Supplement: 41467_2018_5439_MOESM1_ESM.pdf [file 41467_2018_5439_MOESM1_ESM.pdf]

Supplementary Information File:

JNK regulates muscle remodeling via Myostatin/SMAD inhibition  
Lessard et al., *Nature Communications*, 2018

## A Voluntary Wheel Running

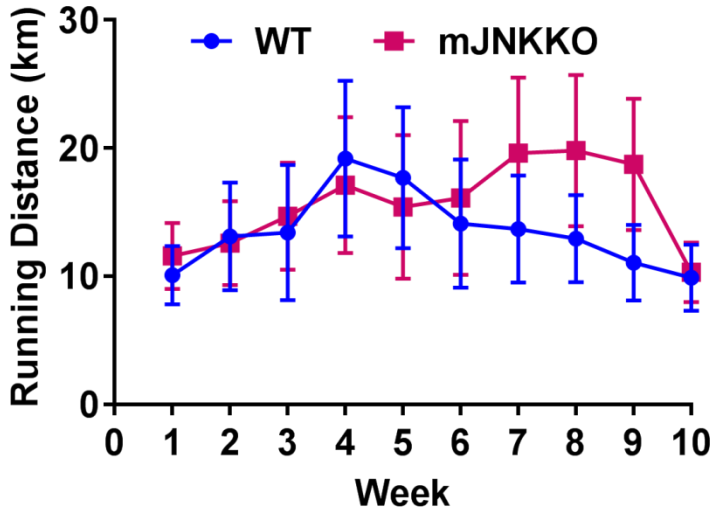

## B Cumulative Running Distance

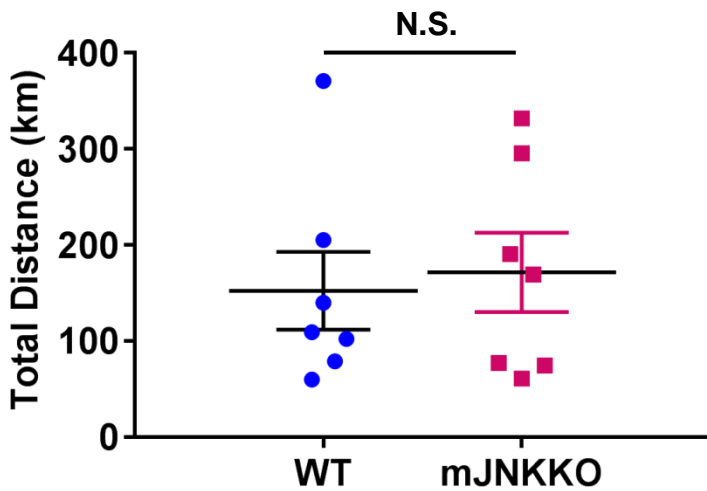

**Supplementary Figure 1.** Muscle-specific JNK1/2 knockout mJNKKO mice and wild-type (WT) were housed in cages with running wheels for 10 wks. A) Average weekly voluntary running distance, and B) Total running distance were calculated. N=7 animals/group. Data are presented as Mean +/- SEM. N.S., not statistically significant by unpaired T-Test.

**Supplementary Figure 2**  
**Uncropped Blots from Figure 3A**

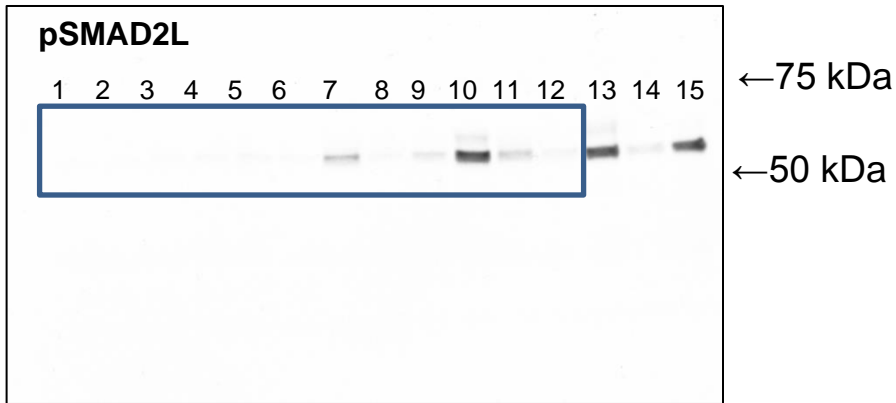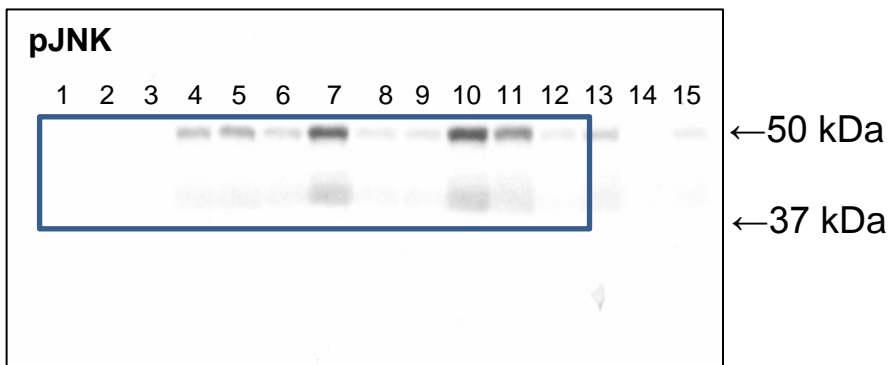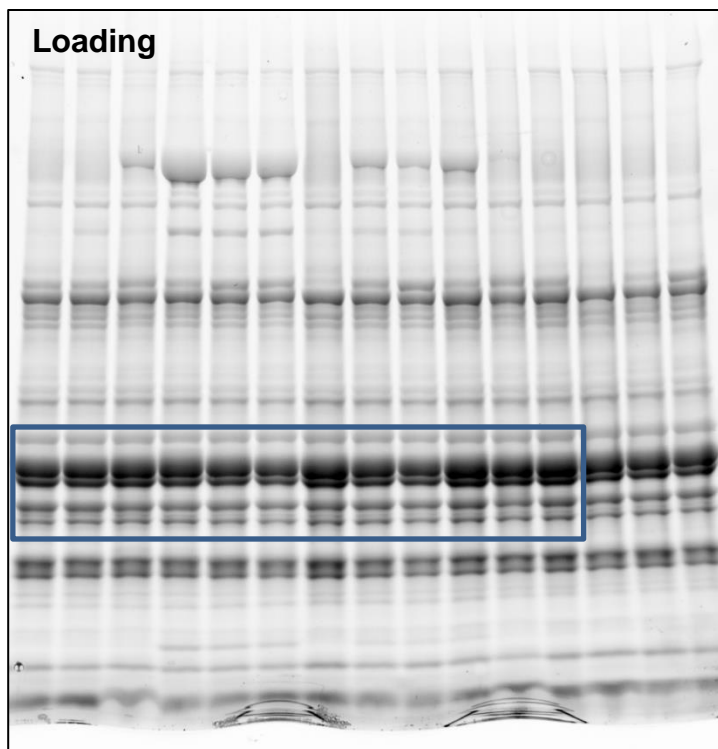

**Mouse Treadmill Running**

Lanes:

1-3: Rest

4-6: 15 min running

7-9: 30 min running

10-12: 60 min running

13-15: 60 min running + 30 min rest

## Uncropped Blots from Figure 3B

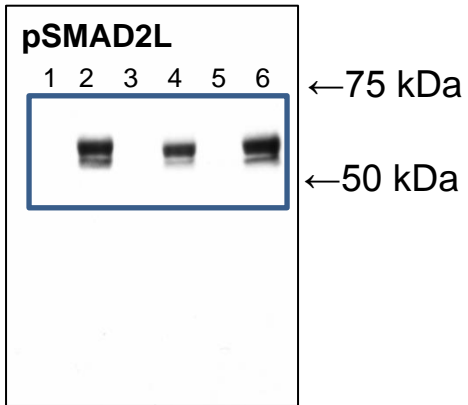

## Mouse In Situ Contraction

Lane:

- 1: Mouse 1 Basal leg
- 2: Mouse 1 Contracted leg
- 3: Mouse 2 Basal leg
- 4: Mouse 2 Contracted leg
- 5: Mouse 3 Basal leg
- 6: Mouse 3 Contracted leg

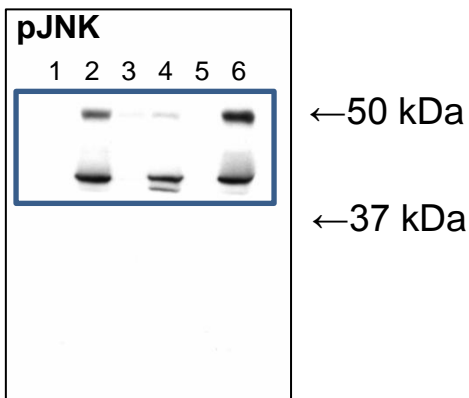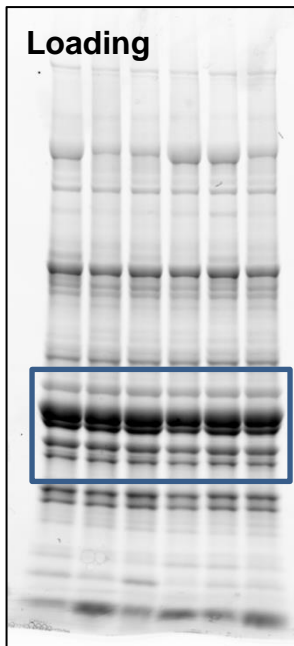

**Uncropped Blots from Figure 3C**

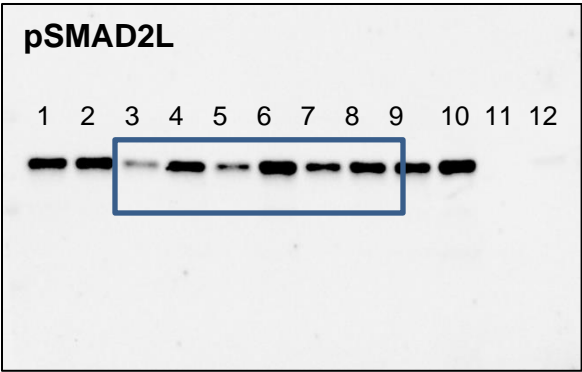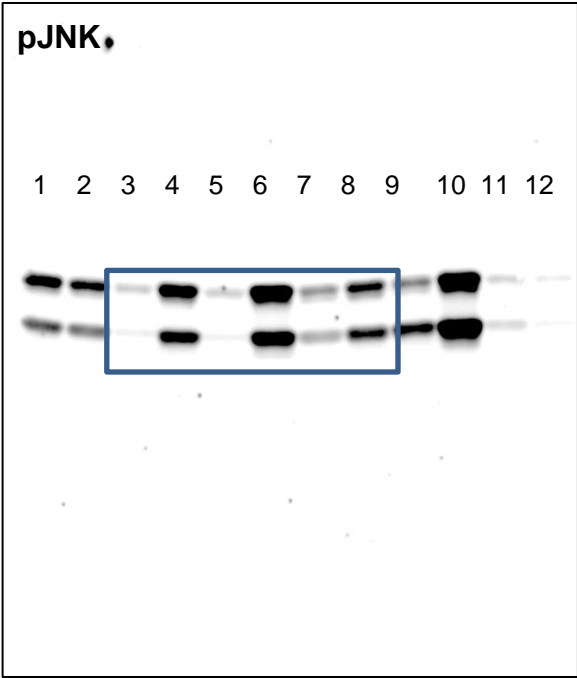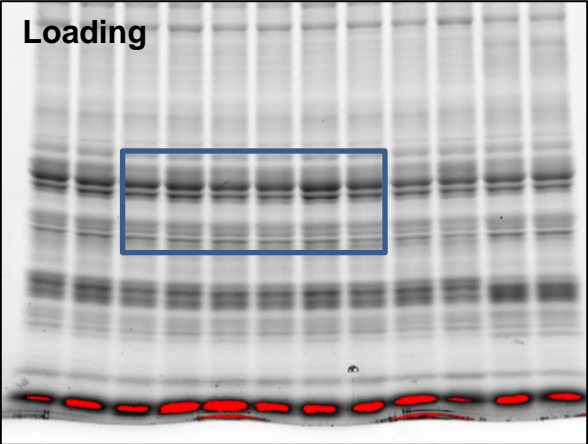

**Mouse Stretch Experiments**

- Lane:
- 1: Mouse 1 Basal Muscle
  - 2: Mouse 1 Stretched Muscle
  - 3: Mouse 2 Basal Muscle
  - 4: Mouse 2 Stretched Muscle
  - 5: Mouse 3 Basal Muscle
  - 6: Mouse 3 Stretched Muscle
  - 7: Mouse 4 Basal Muscle
  - 8: Mouse 4 Stretched Muscle
  - 9: Mouse 5 Basal Muscle
  - 10: Mouse 5 Stretched Muscle
  - 11: Mouse 6 Control Muscle  
(flash frozen: Non-incubated)
  - 12: Mouse 6 Control Muscle  
(flash frozen: Non-incubated)

# Uncropped Blots from Figure 4A

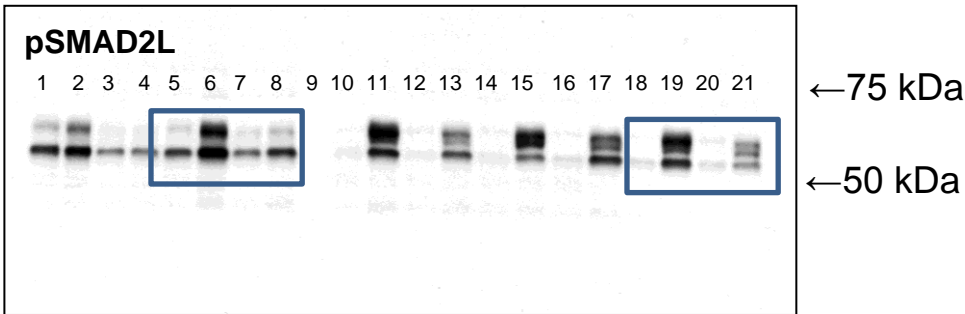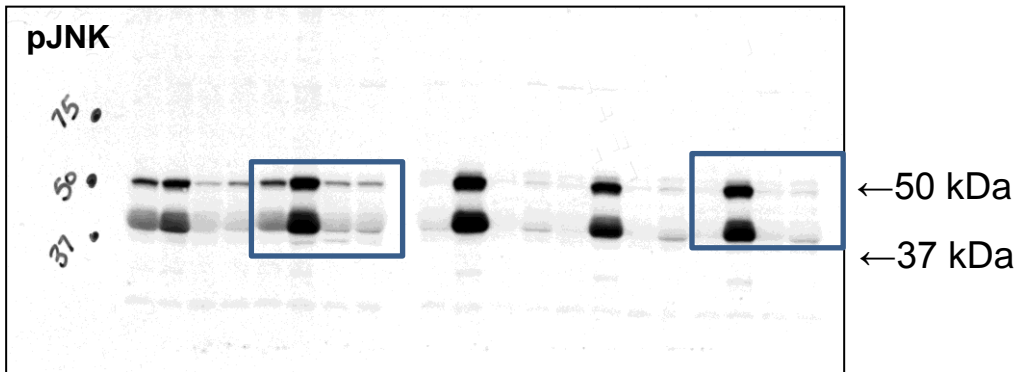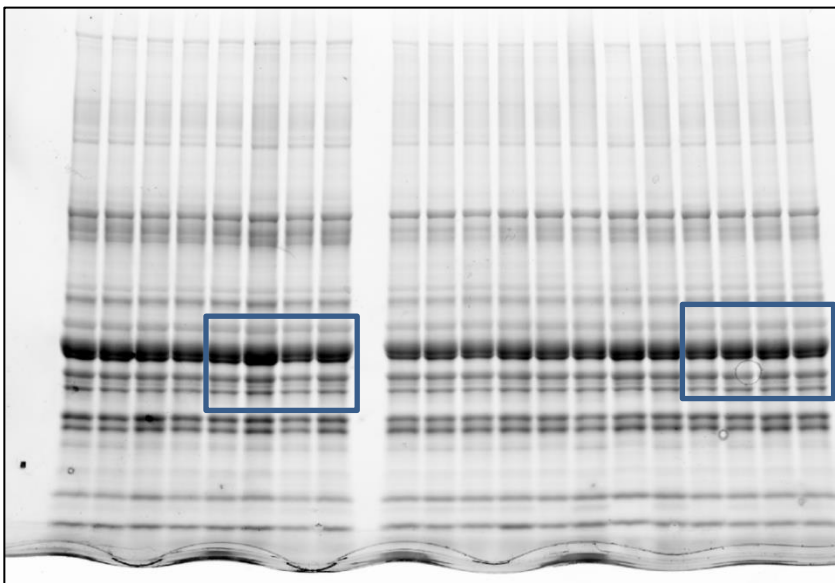

## Mouse In Vitro Contract Experiment

Lane:

- 1: WT 1 Basal Muscle
- 2: WT 1 Contracted Muscle
- 3: KO 2 Basal Muscle
- 4: KO 2 Contracted Muscle
- 5: WT 3 Basal Muscle
- 6: WT 3 Contracted Muscle
- 7: KO 4 Basal Muscle
- 8: KO 4 Contracted Muscle
- 9: Empty Lane

## Mouse In Situ Contract Experiment

Lanes:

- 10: WT 5 Basal Muscle
- 11: WT 5 Contracted Muscle
- 12: KO 6 Basal Muscle
- 13: KO 6 Contracted Muscle
- 14: WT 7 Basal Muscle
- 15: WT 7 Contracted Muscle
- 16: KO 8 Basal Muscle
- 17: KO 8 Contracted Muscle
- 18: WT 9 Basal Muscle
- 19: WT 9 Contracted Muscle
- 20: KO 10 Basal Muscle
- 21: KO 10 Contracted Muscle

WT: Wild-type Control Mouse  
KO: mJNKKO Mouse

Uncropped Blots:  
Figure 4D

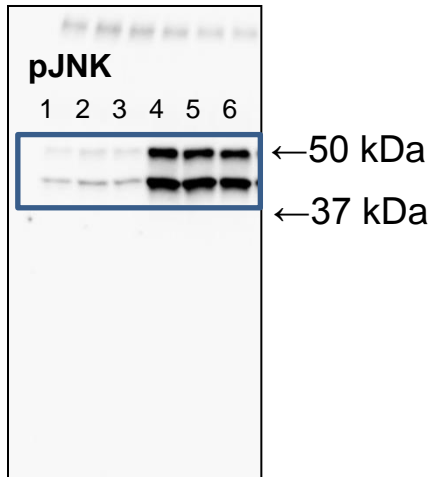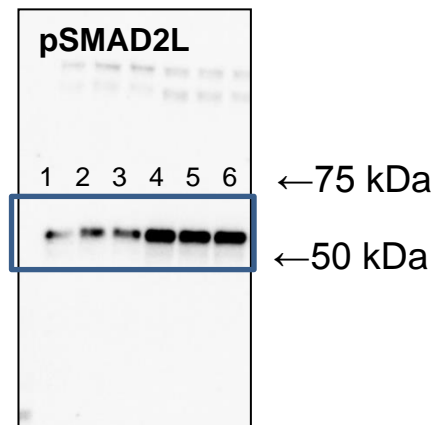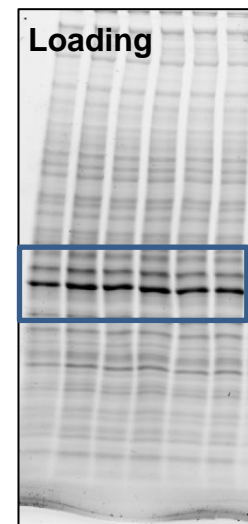

**C2C12 Myoblasts**

Lanes:

1-3: Vehicle

4-6: 5  $\mu$ M Anisomycin

Uncropped Blots:  
Figure 4E

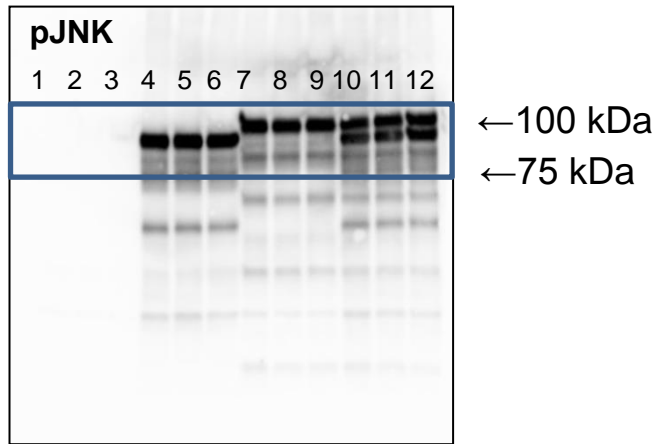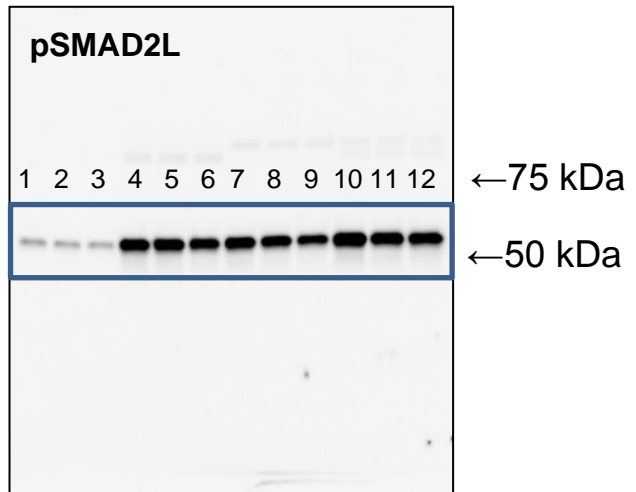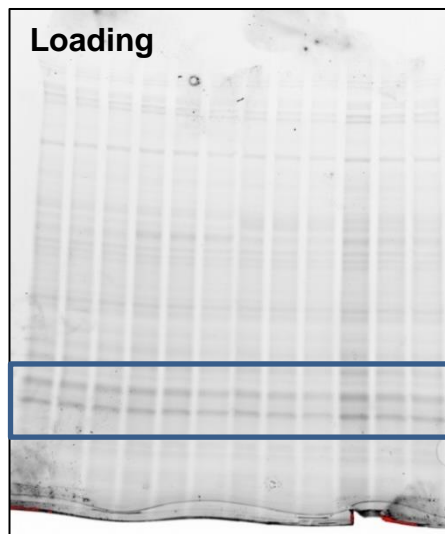

**C2C12 Myoblasts**

Lanes:

1-3: Empty Vector

4-6: Active JNK1 overexpression

7-9: Active JNK 2 overexpression

10-12: Active JNK1 and JNK2 overexpression

## Uncropped Blots from Figure 4F

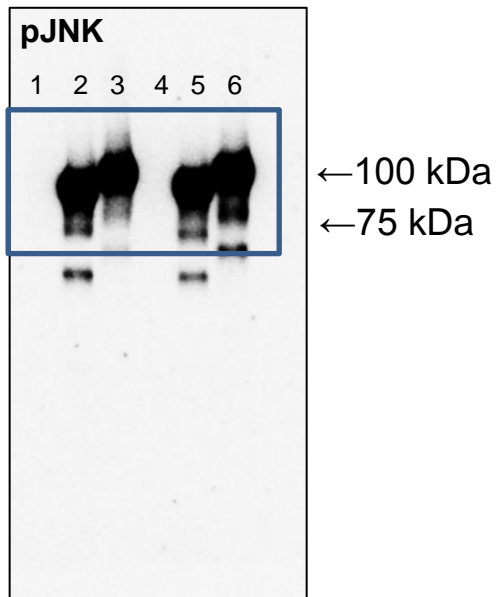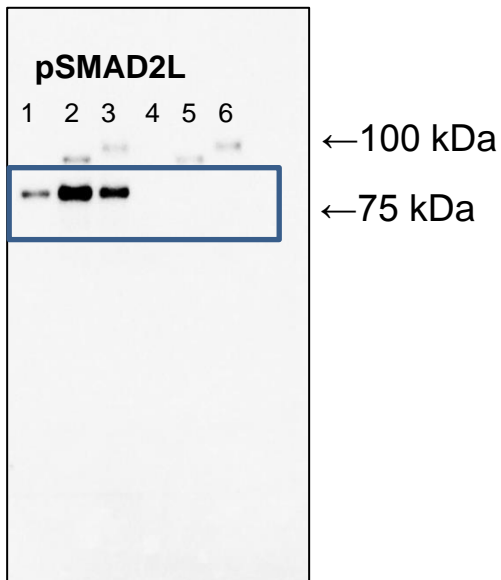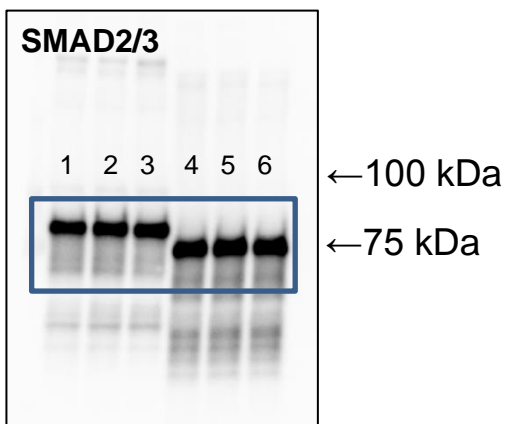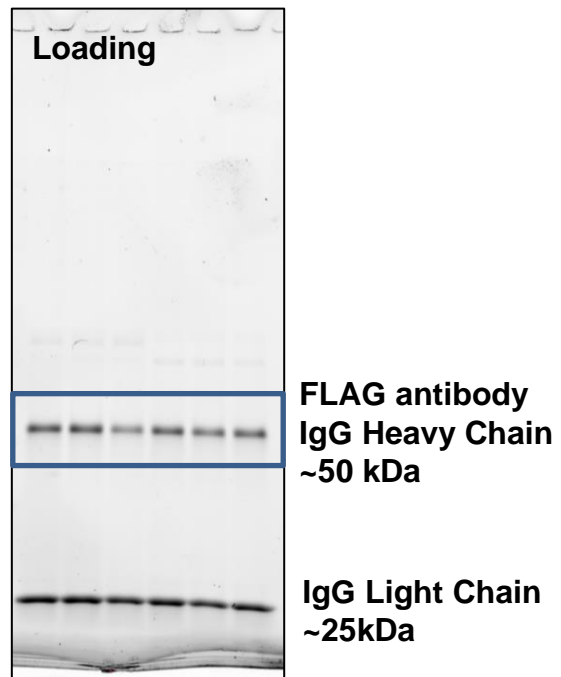

### In vitro JNK activity assay experiment Lane

- 1: Empty Vector + Recombinant SMAD2
- 2: Active JNK1 + Recombinant SMAD2
- 3: Active JNK2 + Recombinant SMAD2
- 4: Empty Vector + Recombinant SMAD3
- 5: Active JNK1 + Recombinant SMAD3
- 6: Active JNK2 + Recombinant SMAD3



## Uncropped Blots from Figure 5B

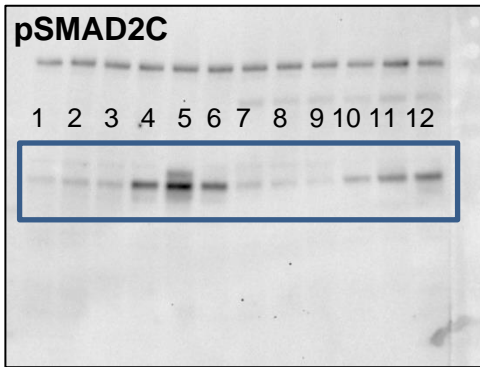

### Active JNK + Myostatin Experiment Whole-Cell Lysates

Lane

1-3: EV + Vehicle Control

4-6: EV + 20 nM Myostatin

7-9: Active JNK + Vehicle Control

10-12: Active JNK + 20 nM Myostatin

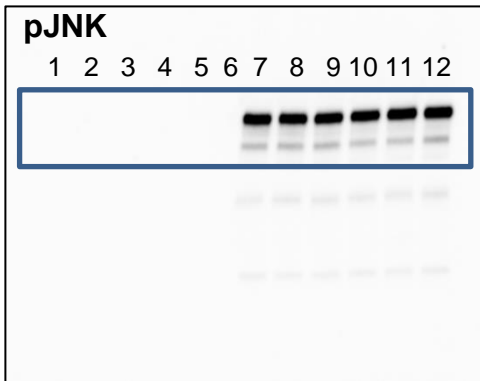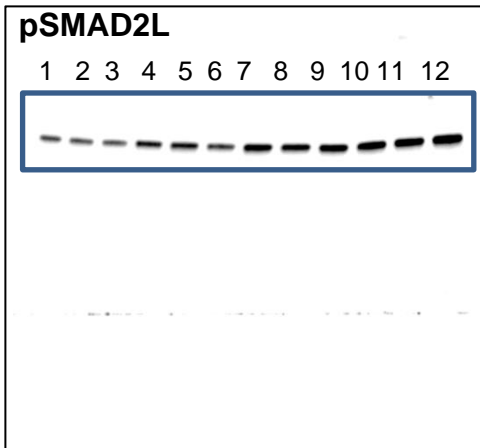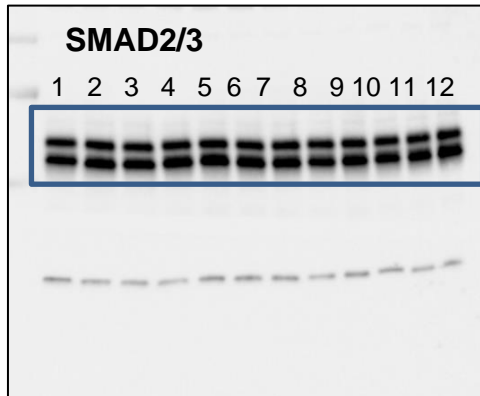

# Uncropped Blots from Figure 5C

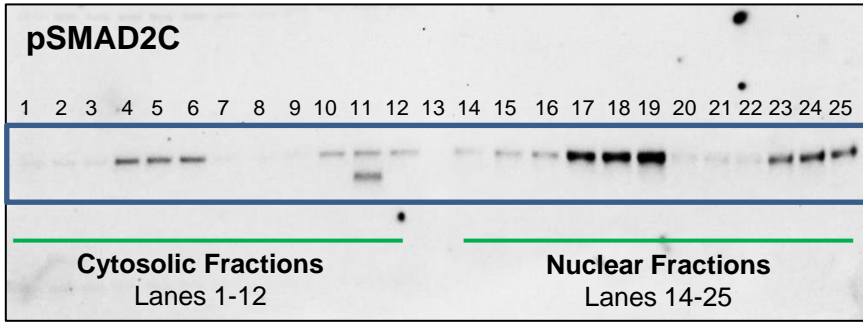

←75 kDa

←50 kDa

\*See next page for detailed lane identification

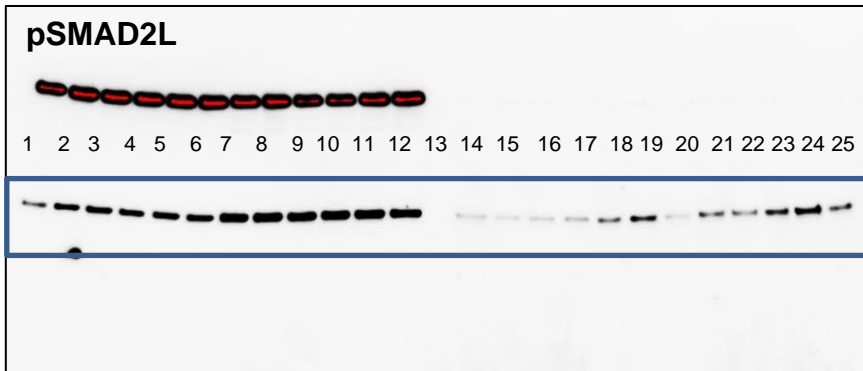

←75 kDa

←50 kDa

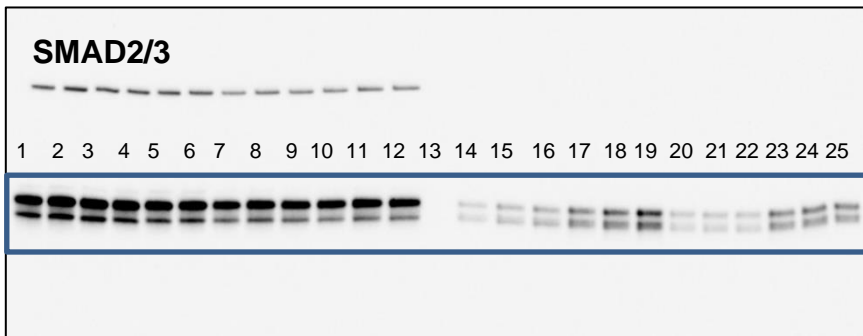

←75 kDa

←50 kDa

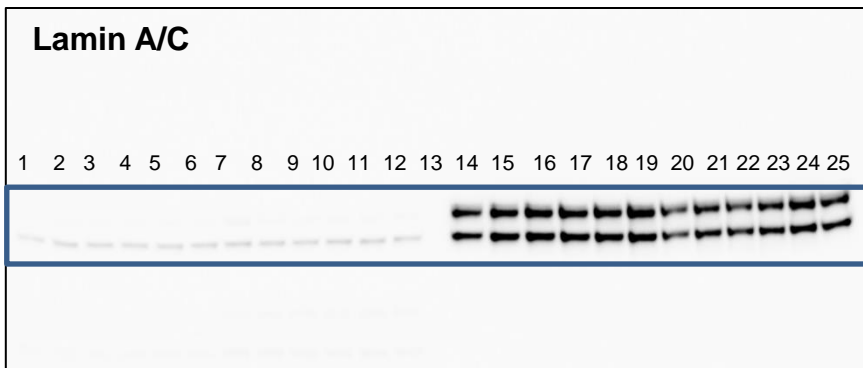

←75 kDa

←50 kDa

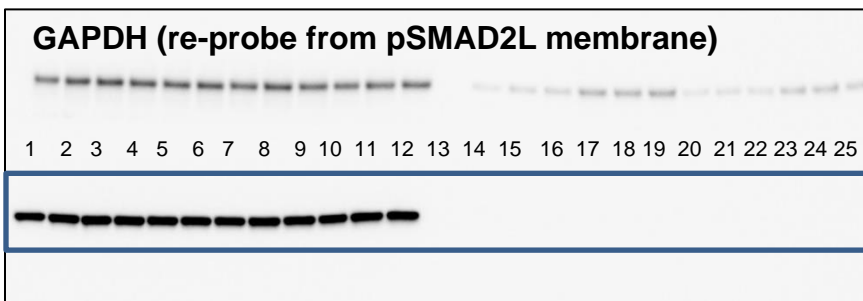

←pSMAD2L band

←37 kDa  
GAPDH band

**Uncropped Blots from Figure 5C  
(continued)**

**Active JNK + Myostatin Experiment in C2C12  
Cytosolic Fractions**

Lane

1-3: EV + Vehicle Control

4-6: EV + 20 nM Myostatin

7-9: Active JNK + Vehicle Control

10-12: Active JNK + 20 nM Myostatin

13: Empty Lane

**Nuclear Fractions**

Lane

14-16: EV + Vehicle Control

17-19: EV + 20 nM Myostatin

20-22: Active JNK + Vehicle Control

23-25: Active JNK + 20 nM Myostatin

Uncropped Blots from Figure 7A

\*See next page for detailed lane identification

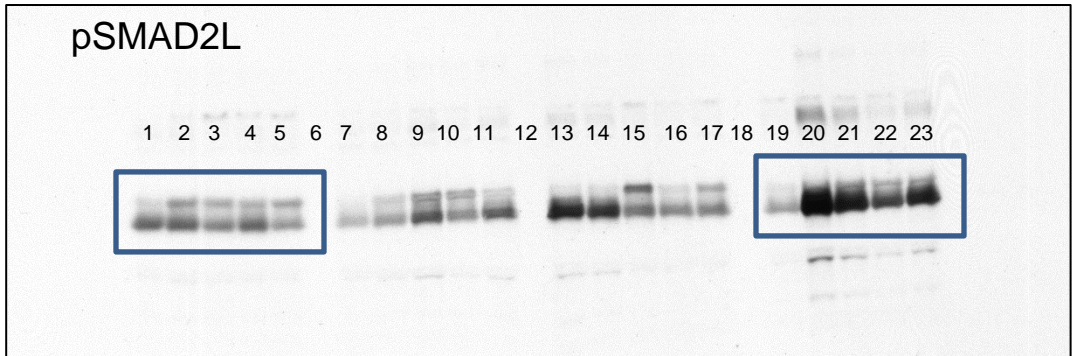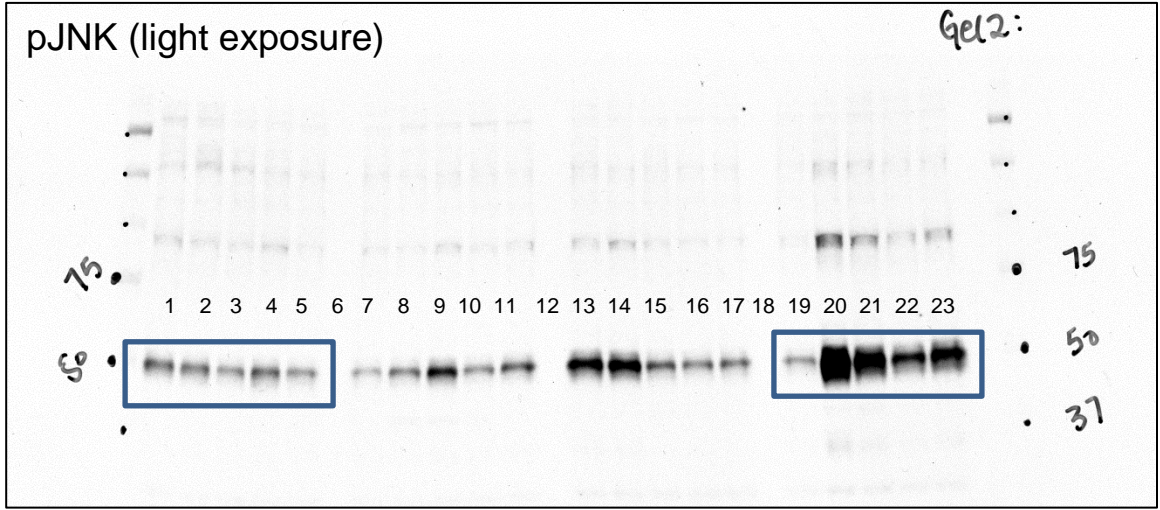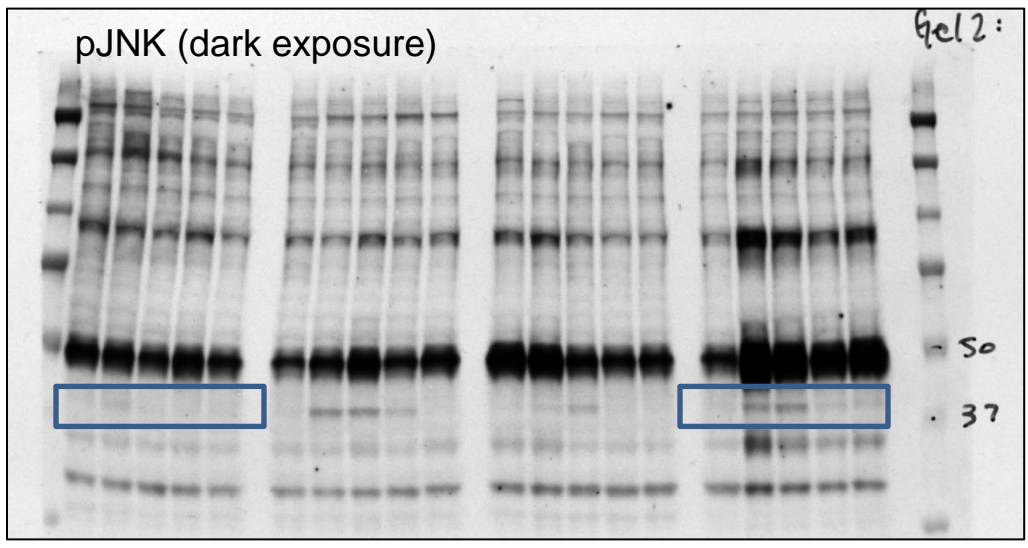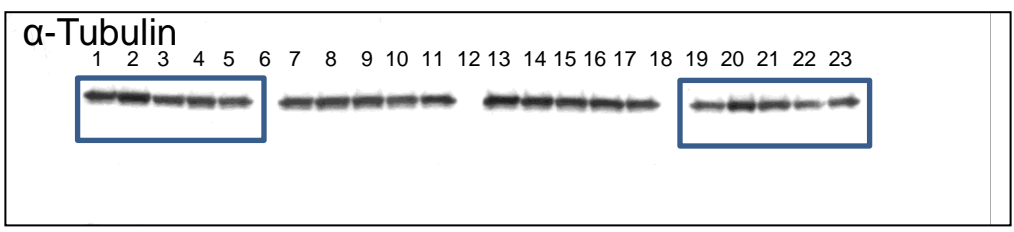

**Uncropped Blots from Figure 7A  
(continued)**

**Human Endurance and Resistance Exercise Time-Course Samples**

Lane:

- 1: Subject C3 Rest
- 2: Subject C3 0 min Post-Exercise
- 3: Subject C3 15 min Post-Exercise
- 4: Subject C3 30 min Post-Exercise
- 5: Subject C3 60 min Post-Exercise
- 6: Empty Lane
- 7: Subject R3 Rest
- 8: Subject R3 0 min Post-Exercise
- 9: Subject R3 15 min Post-Exercise
- 10: Subject R3 30 min Post-Exercise
- 11: Subject R3 60 min Post-Exercise
- 12: Empty Lane
- 13: Subject C4 Rest
- 14: Subject C4 15 min Post-Exercise
- 15: Subject C4 0 min Post-Exercise
- 16: Subject C4 30 min Post-Exercise
- 17: Subject C4 60 min Post Exercise
- 18: Empty Lane
- 19: Subject R4 Rest
- 20: Subject R4 0 min Post-Exercise
- 21: Subject R4 15 min Post-Exercise
- 22: Subject R4 30 min Post-Exercise
- 23: Subject R4 60 min Post-Exercise
